# Supplementary material for: Description of the Fifth New Species of Russula subsect. Maculatinae from Pakistan Indicates Local Diversity Hotspot of Ectomycorrhizal Fungi in Southwestern Himalayas
Source: MDPI journal article supplement (doi:10.3390/life11070662), 2021-07-06
Supplement: s1 [file s1]

**Supplementary Table S1.** Specimens and GenBank accession numbers of DNA sequences used in the phylogenetic analysis. All sequences of *R. ayubiana* were produced in this study.

| <i>Taxon</i>                  | <i>Voucher collection (herbarium)</i> | <i>Country</i> | <i>mtSSU</i> | <i>LSU</i> | <i>RPB2</i> | <i>TEF1α</i> |
|-------------------------------|---------------------------------------|----------------|--------------|------------|-------------|--------------|
| <i>R. adulterina</i>          | SAV F-4451                            | Poland         | MG386730     |            | MG386750    |              |
| <i>R. abbotabadensis</i>      | LAH 310099                            | Pakistan       | MG386718     |            | MG386736    |              |
| <i>R. abbotabadensis</i>      | LAH 310071                            | Pakistan       | MG386719     | MN518356   | MG386737    | MZ364137     |
| <i>R. abbotabadensis</i>      | FH 00304558                           | Pakistan       | MG386721     | MN518355   | MG386738    | MZ364138     |
| <i>R. ayubiana</i>            | LAH 35438                             | Pakistan       | MZ364121     | MZ358816   | MZ364131    | MZ364139     |
| <i>R. ayubiana</i>            | LAH 35439                             | Pakistan       | MZ364122     | MZ358817   | MZ364132    | MZ364140     |
| <i>R. cuprea</i>              | GENT (2010 BT168)                     | Germany        | MG386731     | MZ358818   | MG386751    |              |
| <i>R. dryadicola</i>          | TURA 151632                           | Finland        | MG386728     | MN518357   | MG386745    | MZ364141     |
| <i>R. dryadicola</i>          | TURA 152390                           | Finland        | MG386729     | MZ358820   | MG386746    | MZ364142     |
| <i>R. dryadicola</i>          | UPS (at2004140)                       | Sweden         | MZ364125     | MN518358   | MG386747    | MZ364143     |
| <i>R. dryadicola</i>          | IB 2002/0432                          | Italy          | MG386722     | MZ358819   | MG386739    |              |
| <i>R. globispora</i>          | SAV (HK12021)                         | Sweden         | MZ364123     | MN518362   | MZ364133    | MZ364144     |
| <i>R. globispora</i>          | GENT (2007 BT121)                     | Germany        | MG386726     | MG944274   | MG386743    | MZ364145     |
| <i>R. globispora</i>          | GENT (2007 BT98)                      | Germany        | MG386727     | MZ358822   | MG386744    | MZ364146     |
| <i>R. globispora</i>          | GENT (2010 BT188)                     | Germany        | MZ364124     | MZ358821   | MZ364134    | MZ364147     |
| <i>R. juniperina</i>          | SAV F-4998                            | Italy          |              |            | MG386749    | MZ364148     |
| <i>R. maculata</i>            | SAV F-2130                            | Estonia        | MG944263     | MG944277   | MG944253    |              |
| <i>R. maculata</i>            | SAV F-933                             | Slovakia       | MG944262     | MG944275   | MZ364135    |              |
| <i>R. mansehraensis</i>       | HUP SUR 180                           | Pakistan       | MG944266     | MG944280   | MG944255    |              |
| <i>R. mansehraensis</i>       | HUP SUR 803                           | Pakistan       | MG944267     |            | MG944256    |              |
| <i>R. mattirolana</i>         | KRA F-2018-1                          | Poland         | MZ364126     | MK105723   | MZ364136    | MZ364149     |
| <i>R. mattirolana</i>         | KRA F-2018-2                          | Poland         | MZ364127     | MK105724   | MK102759    | MZ364150     |
| <i>R. mattirolana</i>         | GK8136                                | Greece         |              | MK105722   | MK102758    |              |
| <i>R. mediterraneensis</i>    | MCVE 29086 (MG636)                    | Italy          | MZ364128     | MZ358824   | MK102761    | MZ364151     |
| <i>R. mediterraneensis</i>    | MCVE 29085 (MG630)                    | Italy          | MZ364129     | MZ358823   | MK102760    |              |
| <i>R. nymphaeum</i>           | M (HM R-12180)                        | France         | MG944270     | MG944283   | MG944259    |              |
| <i>R. nymphaeum</i>           | STU (HJB10019)                        | Belgium        | MZ364130     | MN518353   | DQ421956    |              |
| <i>R. quercus-floribundae</i> | LAH 36219                             | Pakistan       | MN053397     | MN513043   | MN053389    | MZ364152     |

|                               |             |          |          |          |          |          |
|-------------------------------|-------------|----------|----------|----------|----------|----------|
| <i>R. quercus-floribundae</i> | LAH 36220   | Pakistan | MN053396 | MN513043 | MN053390 | MZ364153 |
| <i>R. tengii</i>              | HMAS 264837 | China    | MG386733 | MN518360 | MG386753 | MG386707 |
| <i>R. tengii</i>              | HMAS 262728 | China    | MG386734 |          | MG386754 | MZ364154 |
| <i>R. tengii</i>              | HMAS 244255 | China    | MG386735 |          | MG386755 | MZ364155 |
| <i>R. tengii</i>              | HMAS 251829 | China    | MG386732 | MN518359 | MG386752 | MZ364156 |
